# Supplementary material
Source: MDPI journal article supplement (https://www.mdpi.com/2077-0472/11/5/467)
Supplement: s1 [file s1]

## SUPPLEMENTARY MATERIALS

**Table S1.** Details of reagents used in the study

| Reagent name                                                                              | Chemical name                                                                             | Manufacturer                                                                                                         |
|-------------------------------------------------------------------------------------------|-------------------------------------------------------------------------------------------|----------------------------------------------------------------------------------------------------------------------|
| Nitrogen gas                                                                              | N <sub>2</sub>                                                                            | 北海道エア ウォーター株式会社, Hokkaido, Japan                                                                                     |
| Potassium dichromate                                                                      | K <sub>2</sub> Cr <sub>2</sub> O <sub>7</sub>                                             | Ajex Finechem Pty Ltd, Albany, Auckland, New Zealand                                                                 |
| Sulfuric acid                                                                             | H <sub>2</sub> SO <sub>4</sub>                                                            | Merck KGaA, Darmstadt, Germany                                                                                       |
| 1-10-phenanthroline<br>Monohydrate                                                        | C <sub>12</sub> H <sub>8</sub> N <sub>2</sub> • H <sub>2</sub> O                          | Kemaus Chemical, Cherryblook, Australia<br>Ajex Finechem Pty Ltd, Newmarket, Auckland, New Zealand                   |
| Ferrous sulphate                                                                          | FeSO <sub>4</sub> • 7H <sub>2</sub> O                                                     |                                                                                                                      |
| Potassium dihydrogen<br>orthophosphate                                                    | KH <sub>2</sub> PO <sub>4</sub>                                                           | BDH Laboratory Supplies, Poole, England                                                                              |
| Hydrochloric acid fuming                                                                  | HCl                                                                                       | Merck KGaA, Darmstadt, Germany                                                                                       |
| Ammonium fluoride                                                                         | NH <sub>4</sub> F                                                                         | Merck KGaA, Darmstadt, Germany                                                                                       |
| Ammonium molybdate                                                                        | (NH <sub>4</sub> ) <sub>6</sub> Mo <sub>7</sub> O <sub>24</sub> • 4H <sub>2</sub> O       | Kemaus Chemical, Cherryblook, Australia<br>Ajex Finechem Pty Ltd, Newmarket, Auckland, New Zealand                   |
| L-Ascorbic acid                                                                           | C <sub>6</sub> H <sub>8</sub> O <sub>6</sub>                                              |                                                                                                                      |
| Ammonium acetate                                                                          | CH <sub>3</sub> COONH <sub>4</sub>                                                        | Kemaus Chemical, Cherryblook, Australia                                                                              |
| 2- propanol (Isopropyl<br>alcohol, 99%)                                                   | (CH <sub>3</sub> ) <sub>2</sub> CHOH                                                      | Wako Pure Chemical Industries, Ltd, Osaka, Japan                                                                     |
| Ammonium chloride                                                                         | NH <sub>4</sub> Cl                                                                        | Ajex Finechem Pty Ltd, Albany, Auckland, New Zealand                                                                 |
| Ammonium oxalate                                                                          | (NH <sub>4</sub> ) <sub>2</sub> (COO) <sub>2</sub> • H <sub>2</sub> O                     | Kemaus Chemical, Cherryblook, Australia                                                                              |
| Ammonium hydroxide                                                                        | NH <sub>4</sub> OH                                                                        | Carlo Erba Reagents S.A.S, Val de Reuil, Cedex, France<br>GemChem chemical & laboratory reagents, Maharashtra, India |
| Silver nitrate                                                                            | Ag <sub>3</sub> NO <sub>3</sub>                                                           |                                                                                                                      |
| 10% Sodium chloride<br>acidified                                                          | NaCl                                                                                      | Merck KGaA, Darmstadt, Germany                                                                                       |
| Sodium Hydroxide                                                                          | NaOH                                                                                      | Merck KGaA, Darmstadt, Germany<br>Ajex Finechem Pty Ltd, Newmarket, Auckland, New Zealand                            |
| Boric acid                                                                                | H <sub>3</sub> BO <sub>3</sub>                                                            |                                                                                                                      |
| Sulfuric acid                                                                             | H <sub>2</sub> SO <sub>4</sub>                                                            | Merck KGaA, Darmstadt, Germany                                                                                       |
| Methyl red                                                                                | C <sub>15</sub> H <sub>15</sub> N <sub>3</sub> O <sub>2</sub>                             | Alpha chemika, Mumbai, India                                                                                         |
| Ethanol                                                                                   | C <sub>2</sub> H <sub>5</sub> OH                                                          | Merck KGaA, Darmstadt, Germany                                                                                       |
| Bromocresol green<br>Standard Solution of<br>Potassium, Sodium, Calcium,<br>and Magnesium | C <sub>21</sub> H <sub>14</sub> Br <sub>4</sub> O <sub>5</sub> S<br><br>K, Na, Ca, and Mg | Fisher Scientific UK Limited, Leicestershire, UK<br><br>Merck KGaA, Darmstadt, Germany                               |

**Table S1.** Details of reagents used in the study (continue)

| Reagent name                                                          | Chemical name                                                                                     | Manufacturer                                            |
|-----------------------------------------------------------------------|---------------------------------------------------------------------------------------------------|---------------------------------------------------------|
| Sulfuric acid                                                         | H <sub>2</sub> SO <sub>4</sub>                                                                    | Merck KGaA, Darmstadt, Germany                          |
| Boric acid                                                            | H <sub>3</sub> BO <sub>3</sub>                                                                    | Ajex Finechem Pty Ltd, Newmarket, Auckland, New Zealand |
| Sodium hydroxide                                                      | NaOH                                                                                              | Merck KGaA, Darmstadt, Germany                          |
| Methyl red                                                            | C <sub>15</sub> H <sub>15</sub> N <sub>3</sub> O <sub>2</sub>                                     | Alpha chemika, Mumbai, India                            |
| Trisodium Phosphate 12-water                                          | Na <sub>3</sub> PO <sub>4</sub> • 12H <sub>2</sub> O                                              | Fujifilm Wako Pure Chemical Cooperation, Osaka, Japan   |
| Sodium Hydroxide                                                      | NaOH                                                                                              | Fujifilm Wako Pure Chemical Cooperation, Osaka, Japan   |
| Potassium Chloride                                                    | KCl                                                                                               | Fujifilm Wako Pure Chemical Cooperation, Osaka, Japan   |
| Ethylenediamine- N,N,N',N'-tetraacetic acid, disodium salt, dihydrate | C <sub>10</sub> H <sub>14</sub> N <sub>2</sub> O <sub>8</sub> • 2H <sub>2</sub> O                 | Wako Pure Chemical Industries, Ltd, Osaka, Japan        |
| Sodium Pentacyanonitrosyl ferrate (III) Dihydrate                     | Na <sub>2</sub> Fe(CN) <sub>5</sub> NO • 2H <sub>2</sub> O                                        | Wako Pure Chemical Industries, Ltd, Osaka, Japan        |
| Ammonium Ion Standard Solution                                        | NH <sub>4</sub> <sup>+</sup>                                                                      | Wako Pure Chemical Industries, Ltd, Osaka, Japan        |
| Hydrogen peroxide                                                     | H <sub>2</sub> O <sub>2</sub>                                                                     | Fujifilm Wako Pure Chemical Cooperation, Osaka, Japan   |
| Sodium Hexametaphosphate                                              | (NaPO <sub>3</sub> ) <sub>6</sub>                                                                 | Fujifilm Wako Pure Chemical Cooperation, Osaka, Japan   |
| 1,10 Phenanthroline, monohydrate                                      | C <sub>12</sub> H <sub>9</sub> CIN <sub>2</sub> •H <sub>2</sub> O                                 | Wako Pure Chemical Industries, Ltd, Osaka, Japan        |
| Ammonium acetate                                                      | NH <sub>4</sub> CH <sub>3</sub> CO                                                                | Wako Pure Chemical Industries, Ltd, Osaka, Japan        |
| Acetic acid                                                           | CH <sub>3</sub> COOH                                                                              | Wako Pure Chemical Industries, Ltd, Osaka, Japan        |
| Hydroxylammonium chloride                                             | HONH <sub>3</sub> Cl                                                                              | Wako Pure Chemical Industries, Ltd, Osaka, Japan        |
| Ammonium Iron (II) sulfate 6-water                                    | (NH <sub>4</sub> ) <sub>2</sub> Fe(SO <sub>4</sub> ) <sub>2</sub> (H <sub>2</sub> O) <sub>6</sub> | Wako Pure Chemical Industries, Ltd, Osaka, Japan        |
| Potassium hydrogen phthalate                                          | C <sub>8</sub> H <sub>5</sub> KO <sub>4</sub>                                                     | Wako Pure Chemical Industries, Ltd, Osaka, Japan        |
| Sodium carbonate decahydrate                                          | CH <sub>20</sub> Na <sub>2</sub> O <sub>13</sub>                                                  | Wako Pure Chemical Industries, Ltd, Osaka, Japan        |
| Manganese standard solution                                           | Mn                                                                                                | Wako Pure Chemical Industries, Ltd, Osaka, Japan        |

**Table S2.** Soil characteristics and analysis method before and after soil incubation.

| Before incubation                                                                                                                                               |                                             | After incubation                                                                                                                                                |                                                             |
|-----------------------------------------------------------------------------------------------------------------------------------------------------------------|---------------------------------------------|-----------------------------------------------------------------------------------------------------------------------------------------------------------------|-------------------------------------------------------------|
| Soil parameters                                                                                                                                                 | Methods                                     | Soil parameters                                                                                                                                                 | Methods                                                     |
| Soil pH (1:10) (BI)                                                                                                                                             | pH parameter                                | Soil pH (1:10) (AI)                                                                                                                                             | pH parameter                                                |
| 1:10 EC (BI) (mS.m <sup>-1</sup> )                                                                                                                              | EC parameter                                | 1:10 EC (AI) (mS.m <sup>-1</sup> )                                                                                                                              | EC parameter                                                |
| Avail.P (mg.kg <sup>-1</sup> )                                                                                                                                  | Bray II method                              | SO <sub>4</sub> <sup>2-</sup> -S (AI), NO <sub>3</sub> <sup>-</sup> -N (AI), Cl <sup>-</sup> (AI), PO <sub>4</sub> <sup>3-</sup> -P (AI) (mg.kg <sup>-1</sup> ) | Ion chromatography system (DIONEX ICS-1100)                 |
| SO <sub>4</sub> <sup>2-</sup> -S (BI), NO <sub>3</sub> <sup>-</sup> -N (BI), Cl <sup>-</sup> (BI), PO <sub>4</sub> <sup>3-</sup> -P (BI) (mg.kg <sup>-1</sup> ) | Ion chromatography system (DIONEX ICS-1100) | Mn <sup>2+</sup> (mg.kg <sup>-1</sup> )                                                                                                                         | Z-5010 polarized Zeeman atomic absorption spectrophotometer |
| CEC (cmol.kg <sup>-1</sup> ), Exchangeable base cations (mg.kg <sup>-1</sup> ), Base saturation (%)                                                             | Schollenberger method                       | ExNH <sub>4</sub> (AI) (mg.kg <sup>-1</sup> )                                                                                                                   | 1M KCl extraction, Indophenol-blue method                   |
| SOC (%) and SOM (%)                                                                                                                                             | Walkley-Black acid digestion method         | Fe <sup>2+</sup> (mg.kg <sup>-1</sup> )                                                                                                                         | Phenanthroline method                                       |
| TN (%)                                                                                                                                                          | Kjeldahl method                             | WSOC (mg.kg <sup>-1</sup> )                                                                                                                                     | TOC-5000A total organic carbon analyzer                     |
| Saturated hydraulic conduct                                                                                                                                     | Fall head method                            |                                                                                                                                                                 |                                                             |
| Soil texture (%)                                                                                                                                                | Pipette method                              |                                                                                                                                                                 |                                                             |
| ExNH <sub>4</sub> (BI) (mg.kg <sup>-1</sup> )                                                                                                                   | 1M KCl extraction, Indophenol-blue method   |                                                                                                                                                                 |                                                             |

(BI) indicates result before incubation, and (AI) indicates result after incubation. Where EC, electrical conductivity; SOC, soil organic carbon; SOM, soil organic matter; WSOC, water-soluble organic carbon.

**Table S3.** Correlation matrix for CH<sub>4</sub> production potential (CH<sub>4</sub>PP) and soil properties (before incubation)

|                               | CH <sub>4</sub> PP | pH <sub>BI</sub> | EC <sub>BI</sub> | OM     | OC     | Avail.P | ExK    | ExCa   | ExMg   | ExNa   | Total.N | CEC    | BS   | Cl <sup>-</sup> | NO <sub>3</sub> <sup>-</sup> | PO <sub>4</sub> <sup>3-</sup> | SO <sub>4</sub> <sup>2-</sup> | ExNH <sub>4</sub> (BI) | Sand | Silt |
|-------------------------------|--------------------|------------------|------------------|--------|--------|---------|--------|--------|--------|--------|---------|--------|------|-----------------|------------------------------|-------------------------------|-------------------------------|------------------------|------|------|
| CH <sub>4</sub> PP            |                    |                  |                  |        |        |         |        |        |        |        |         |        |      |                 |                              |                               |                               |                        |      |      |
| pH <sub>BI</sub>              | .07                |                  |                  |        |        |         |        |        |        |        |         |        |      |                 |                              |                               |                               |                        |      |      |
| EC <sub>BI</sub>              | -.09               | -.78**           |                  |        |        |         |        |        |        |        |         |        |      |                 |                              |                               |                               |                        |      |      |
| SOM                           | .13                | -.75**           | .82**            |        |        |         |        |        |        |        |         |        |      |                 |                              |                               |                               |                        |      |      |
| SOC                           | .13                | -.75**           | .82**            | 1.0**  |        |         |        |        |        |        |         |        |      |                 |                              |                               |                               |                        |      |      |
| Avail.P                       | -.05               | -.06             | .10              | .11    | .11    |         |        |        |        |        |         |        |      |                 |                              |                               |                               |                        |      |      |
| ExK                           | -.05               | -.72**           | .80**            | .86**  | .86**  | .18     |        |        |        |        |         |        |      |                 |                              |                               |                               |                        |      |      |
| ExCa                          | -.15               | -.64**           | .65**            | .80**  | .80**  | .14     | .88**  |        |        |        |         |        |      |                 |                              |                               |                               |                        |      |      |
| ExMg                          | -.14               | -.57**           | .70**            | .74**  | .74**  | .17     | .85**  | .87**  |        |        |         |        |      |                 |                              |                               |                               |                        |      |      |
| ExNa                          | -.08               | -.62**           | .76**            | .72**  | .72**  | .15     | .85**  | .80**  | .84**  |        |         |        |      |                 |                              |                               |                               |                        |      |      |
| Total.N                       | -.14               | -.71**           | .78**            | .83**  | .83**  | .16     | .79**  | .77**  | .77**  | .78**  |         |        |      |                 |                              |                               |                               |                        |      |      |
| CEC                           | -.10               | -.66**           | .74**            | .88**  | .88**  | .04     | .86**  | .92**  | .79**  | .79**  | .79**   |        |      |                 |                              |                               |                               |                        |      |      |
| BS                            | -.18               | -.14             | .15              | .08    | .08    | .36*    | .36*   | .37*   | .53**  | .38*   | .20     | .05    |      |                 |                              |                               |                               |                        |      |      |
| Cl <sup>-</sup>               | -.17               | .09              | -.10             | -.18   | -.18   | -.14    | -.19   | -.19   | -.12   | -.12   | -.16    | -.20   | .02  |                 |                              |                               |                               |                        |      |      |
| NO <sub>3</sub> <sup>-</sup>  | .14                | .17              | -.25             | -.36*  | -.36*  | -.05    | -.37*  | -.46** | -.41** | -.34*  | -.40**  | -.47** | -.11 | -.11            |                              |                               |                               |                        |      |      |
| PO <sub>4</sub> <sup>3-</sup> | .09                | .21              | -.13             | -.18   | -.18   | .17     | -.15   | -.21   | -.17   | -.10   | -.20    | -.24   | .30* | -.06            | -.09                         |                               |                               |                        |      |      |
| SO <sub>4</sub> <sup>2-</sup> | .13                | -.67**           | .58**            | .73**  | .73**  | .06     | .59**  | .48**  | .33*   | .51**  | .56**   | .65**  | -.20 | -.16            | -.25                         | -.13                          |                               |                        |      |      |
| ExNH <sub>4</sub> (BI)        | .31*               | -.41**           | .27              | .41**  | .41**  | -.02    | .38*   | .35*   | .24    | .18    | .15     | .36*   | -.03 | -.12            | -.22                         | -.13                          | .31*                          |                        |      |      |
| Sand                          | .16                | .66**            | -.62**           | -.81** | -.81** | .00     | -.73** | -.84** | -.69** | -.67** | -.77**  | -.91** | .04  | .04             | .53**                        | .34*                          | -.58**                        | -.40**                 |      |      |

|      |      |        |       |       |       |      |       |       |       |       |       |       |      |      |        |       |       |       |        |       |
|------|------|--------|-------|-------|-------|------|-------|-------|-------|-------|-------|-------|------|------|--------|-------|-------|-------|--------|-------|
| Silt | -.14 | -.66** | .61** | .82** | .82** | .01  | .72** | .83** | .68** | .64** | .79** | .89** | -.04 | -.06 | -.51** | -.34* | .58** | .42** | -.99** |       |
| Clay | -.19 | -.63** | .60** | .76** | .76** | -.01 | .72** | .82** | .68** | .68** | .72** | .91** | -.05 | -.01 | -.54** | -.33* | .56** | .36*  | -.98** | .93** |

---

\* Correlation is significant at the  $P < 0.05$  level (2-tailed).

\*\* Correlation is significant at the  $P < 0.01$  level (2-tailed).
